# Supplementary material for: Imidazole derivatives differentially destabilize the low pH conformation of lysozyme through weak electrostatic interactions
Source: Royal Society of Chemistry journal article supplement (doi:10.1039/c6ra23031h), 2016-01-01
Supplement: c6ra23031h1.pdf [file c6ra23031h1.pdf]

## Supplementary Material

### Imidazole Derivatives Differentially Destabilize the Low pH Conformation of Lysozyme through Weak Electrostatic Interactions

Krishnakant Gangele<sup>1</sup> and Krishna Mohan Poluri<sup>1,2\*</sup>

<sup>1</sup>Department of Biotechnology, <sup>2</sup>Centre for Nanotechnology

Indian Institute of Technology Roorkee

Roorkee – 247667, Uttarakhand, India

E-mail:krishfbt@iitr.ac.in / mohanpmk@gmail.com

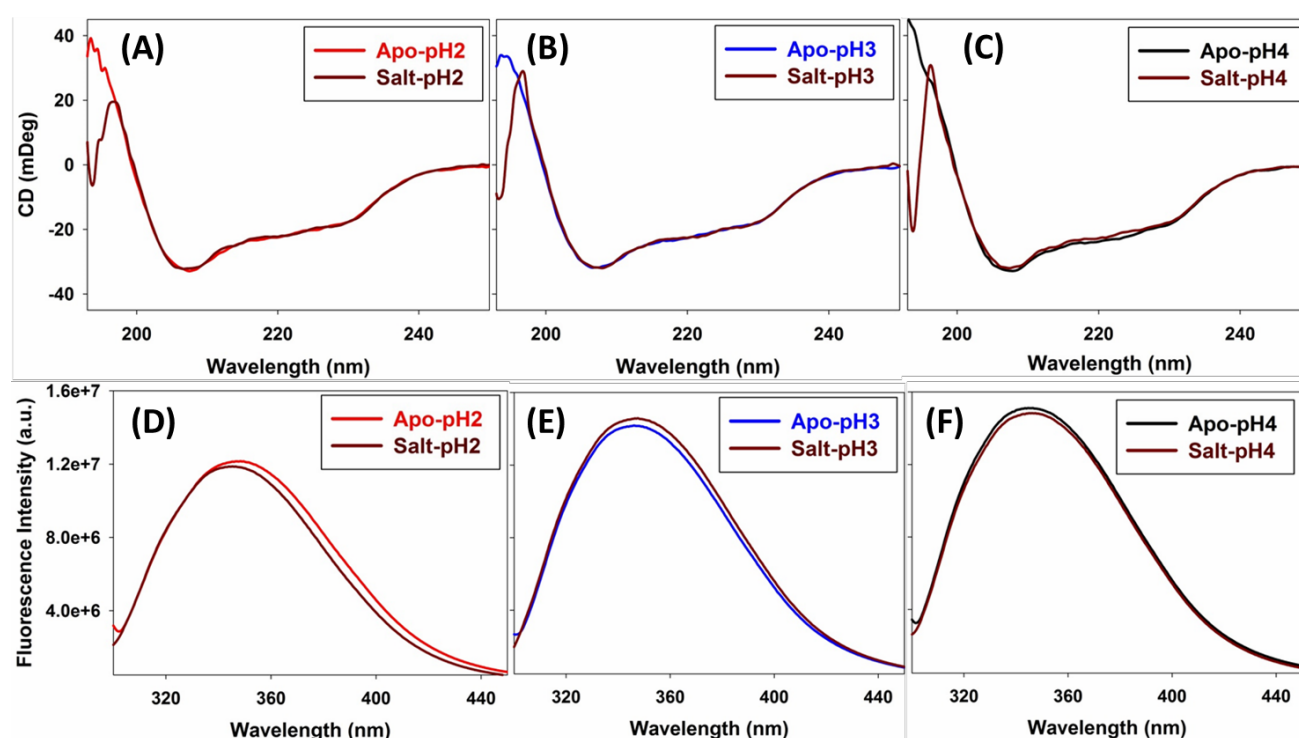

**SFig.1:** (A) to (C) Far-UV CD profile showing the secondary structural changes HEL upon addition of NaCl at different pH; (D) to (F) Fluorescence emission spectra of HEL at different pHs and also with NaCl showing the intensity changes in the Trp fluorescence.
